# Supplementary material for: Bismuth MOF-derived BiOBr/Bi24O31Br10 heterojunctions with enhanced visible-light photocatalytic performance
Source: Royal Society of Chemistry journal article supplement (doi:10.1039/d0cy00019a), 2020-01-01
Supplement: d0cy00019a1.pdf [file d0cy00019a1.pdf]

## Supplementary Information

### Bismuth MOFs derived BiOBr/Bi<sub>24</sub>O<sub>31</sub>Br<sub>10</sub> heterojunctions with enhanced visible-light photocatalytic performance

Ganghong Huang<sup>ab</sup>, Zishun Li<sup>ab</sup>, Kun Liu<sup>\*ab</sup>, Xuekun Tang<sup>ab</sup>, Jing Huang<sup>ab</sup> and Guofan Zhang<sup>\*a</sup>

a. School of Minerals Processing and Bioengineering, Central South University, Changsha 410083, China. E-mail: kliu@csu.edu.cn, csuzhangguofan01@163.com

b. Hunan Key Laboratory of Mineral Materials and Application, Central South University, Changsha 410083, China.

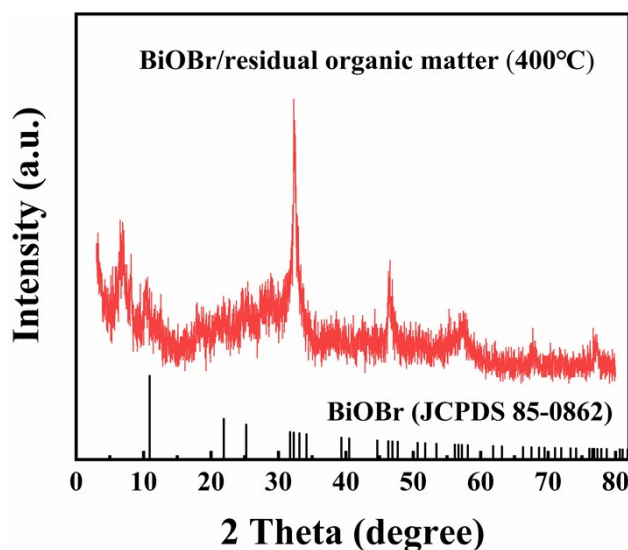

Fig. S1 XRD patterns of 400°C sample

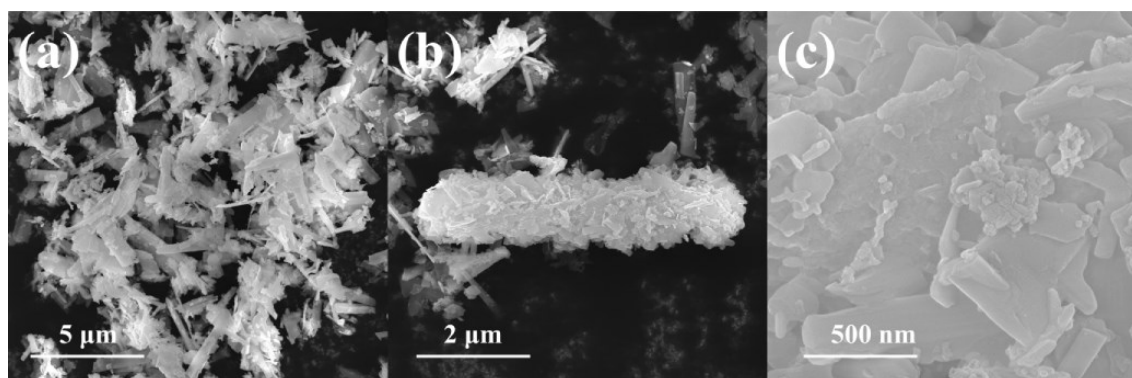

Fig. S2 SEM images of BiOBr/Bi<sub>24</sub>O<sub>31</sub>Br<sub>10</sub> (500°C)

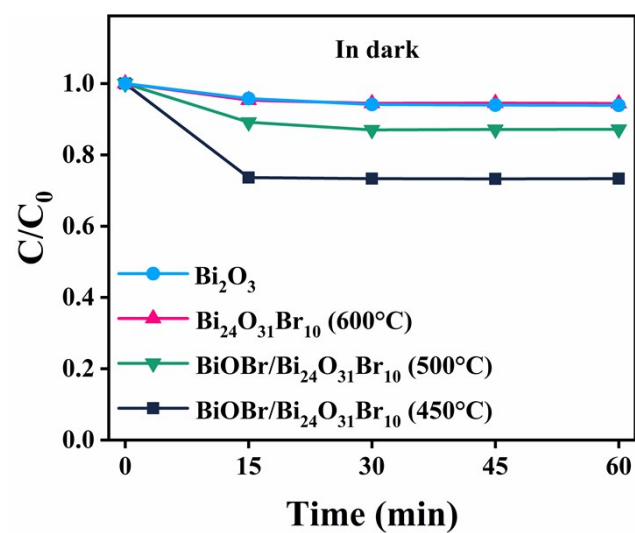

Fig. S3 The adsorption curve of RhB in the dark over different samples.

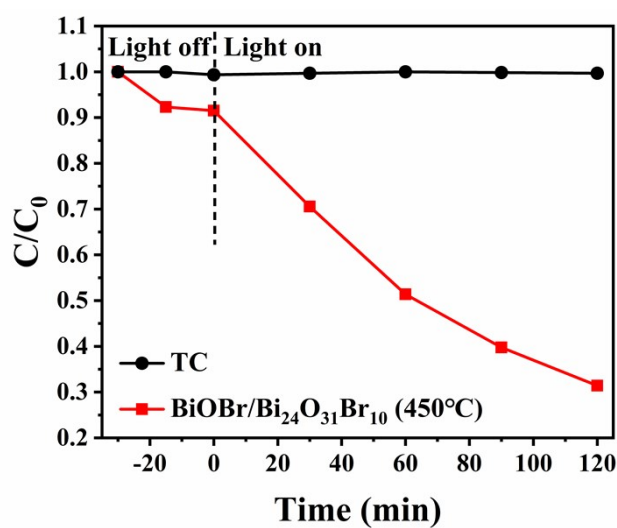

Fig. S4 Photocatalytic degradation of TC (TC: 20 mg/L, catalyst dosage: 50 mg) over  $\text{BiOBr/Bi}_{24}\text{O}_{31}\text{Br}_{10}$  (450°C) under visible light.

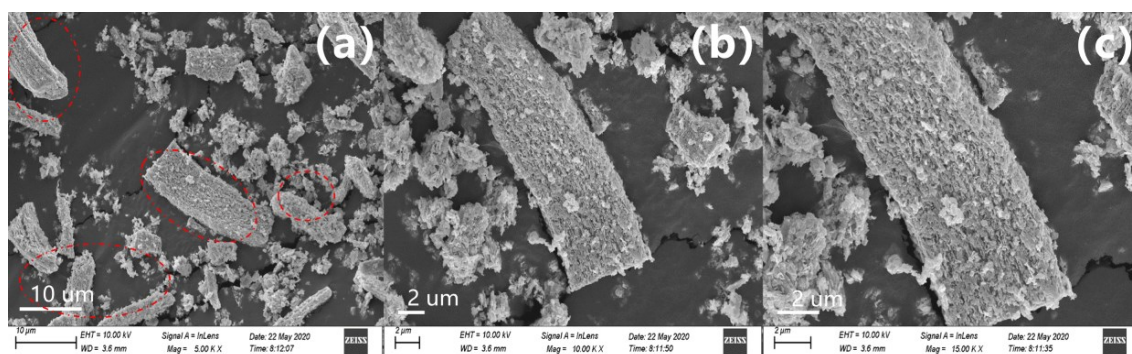

Fig. S5 SEM images of  $\text{BiOBr/Bi}_{24}\text{O}_{31}\text{Br}_{10}$  (450°C) after 4 reuse cycles (the magnification of (a, b, c) is 5 KX, 10 KX, and 15KX respectively).

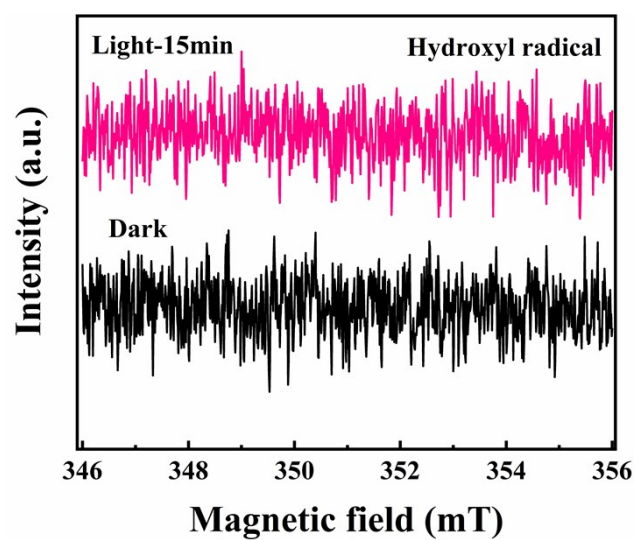

Fig. S6 The ESR spectra of DMPO-•OH adducts over BiOBr/Bi<sub>24</sub>O<sub>31</sub>Br<sub>10</sub> (450°C) in the dark and under visible-light irradiation.
